# Supplementary material
Source: publisher site journal article supplement (https://www.dovepress.com/article/278774)
Supplement: Supplementary file 1 [file get_supplementary_file.php]

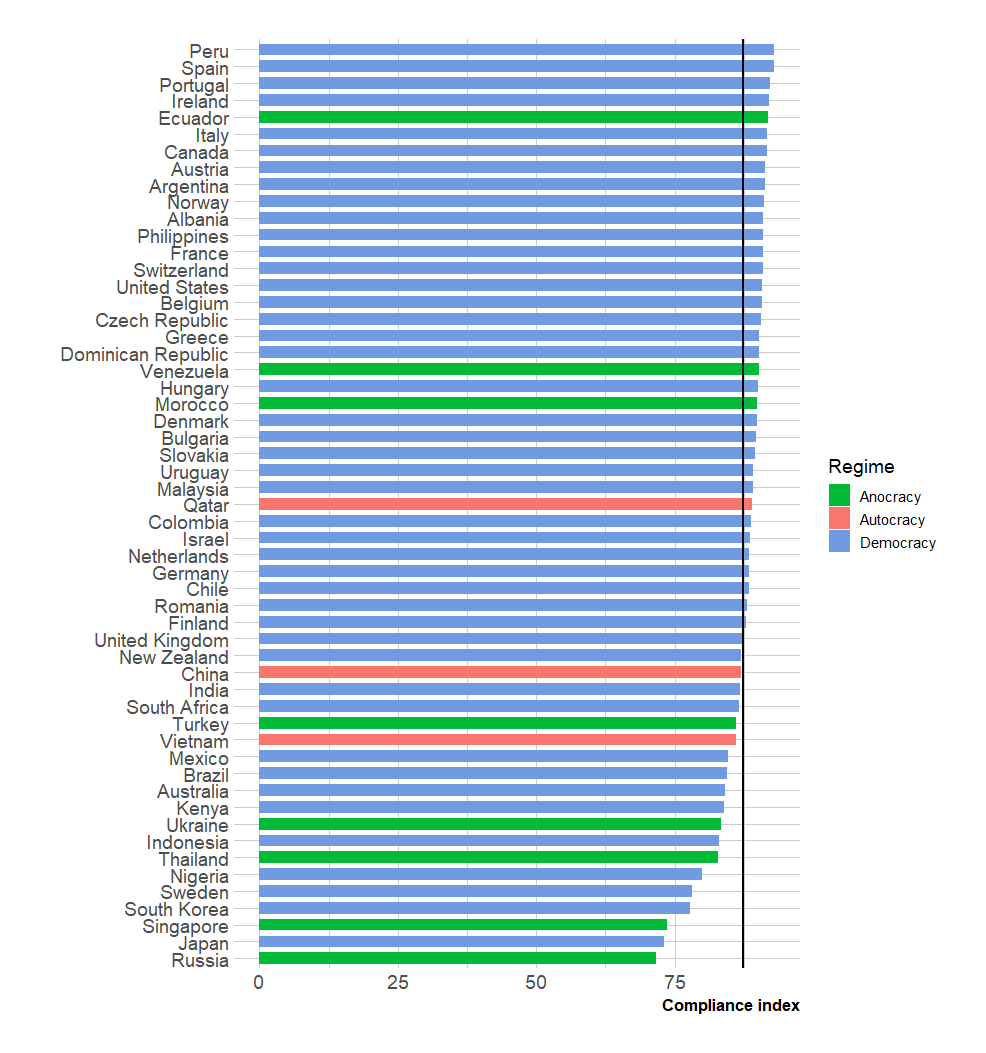


Figure S1. Average compliance index for each country included in the study group by political regimes.
